# Supplementary material
Source: Springer Nature journal article supplement (https://www.springermedizin.de/resource/supplementary/12906_2006_118_MOESM2_ESM.pdf/9524108)

**EUCOMMIA MACERATED CORTEX**

**EXTRACTION with solvents**

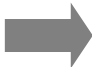

**CRUDE EXTRACTS**

**DCM**      **EA**      **EtOH**      **H<sub>2</sub>O**

**REPORTER GENE, BINDING ASSAYS AND PURIFICATION OF BIOACTIVE FRACTIONS BY: column chromatography, thin layer chromatography, HPLC**

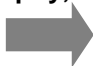

**BIOACTIVE FRACTIONS**

**SPECTROSCOPIC and NMR studies**

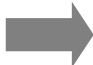

**CHARACTERISATION AND STRUCTURAL ELUCIDATION OF PURE COMPOUNDS**

**CONFIRMATORY REPORTER GENE ASSAYS**

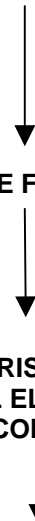

Supplement: MOESM2 [file 9524108]
